# Supplementary material for: Conformational stability and structural analysis of methanethiol clusters: a revisit
Source: Royal Society of Chemistry journal article supplement (doi:10.1039/d1ra04900c), 2021-01-01
Supplement: d1ra04900c1.pdf [file d1ra04900c1.pdf]

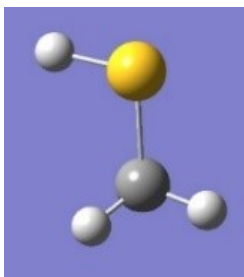

Fig.SI1 Optimized geometry of methanethiol monomer at B3LYP/cc-pVDZ level of theory

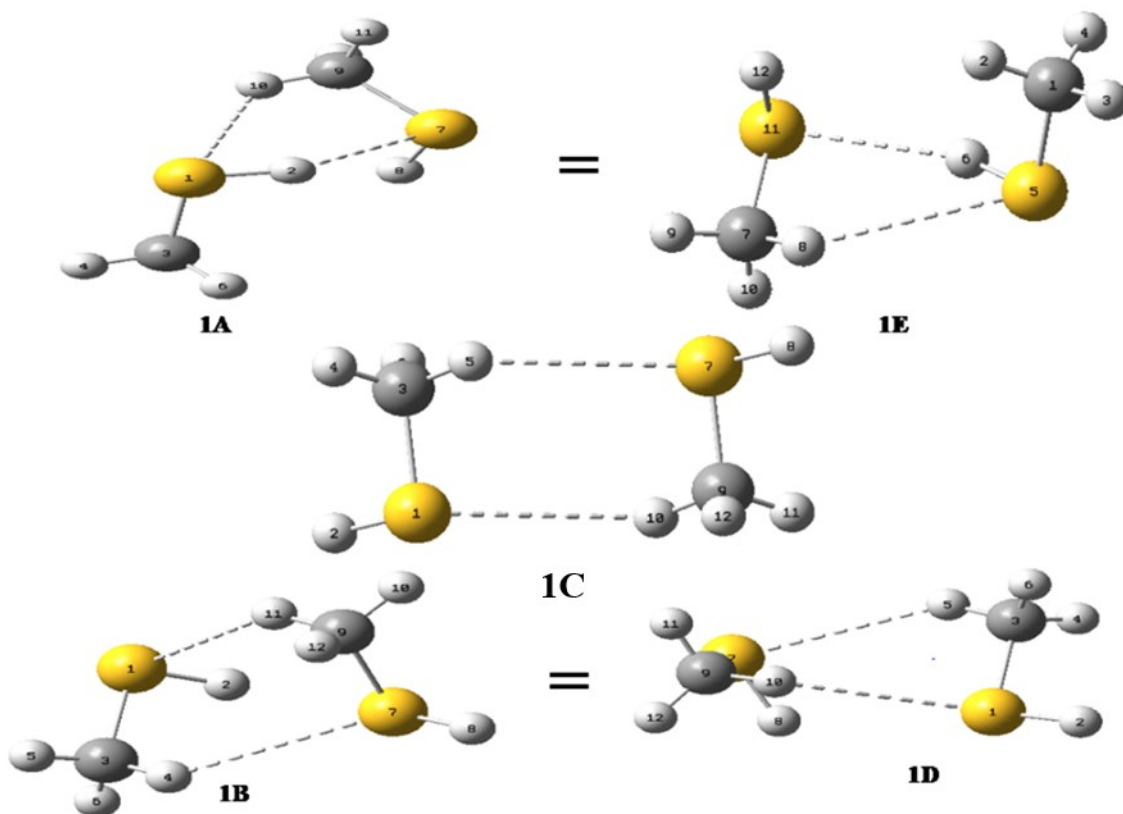

Fig. SI 2(a). Optimized geometry of the conformers of methanethiol dimer at B3LYP/cc-pVDZ

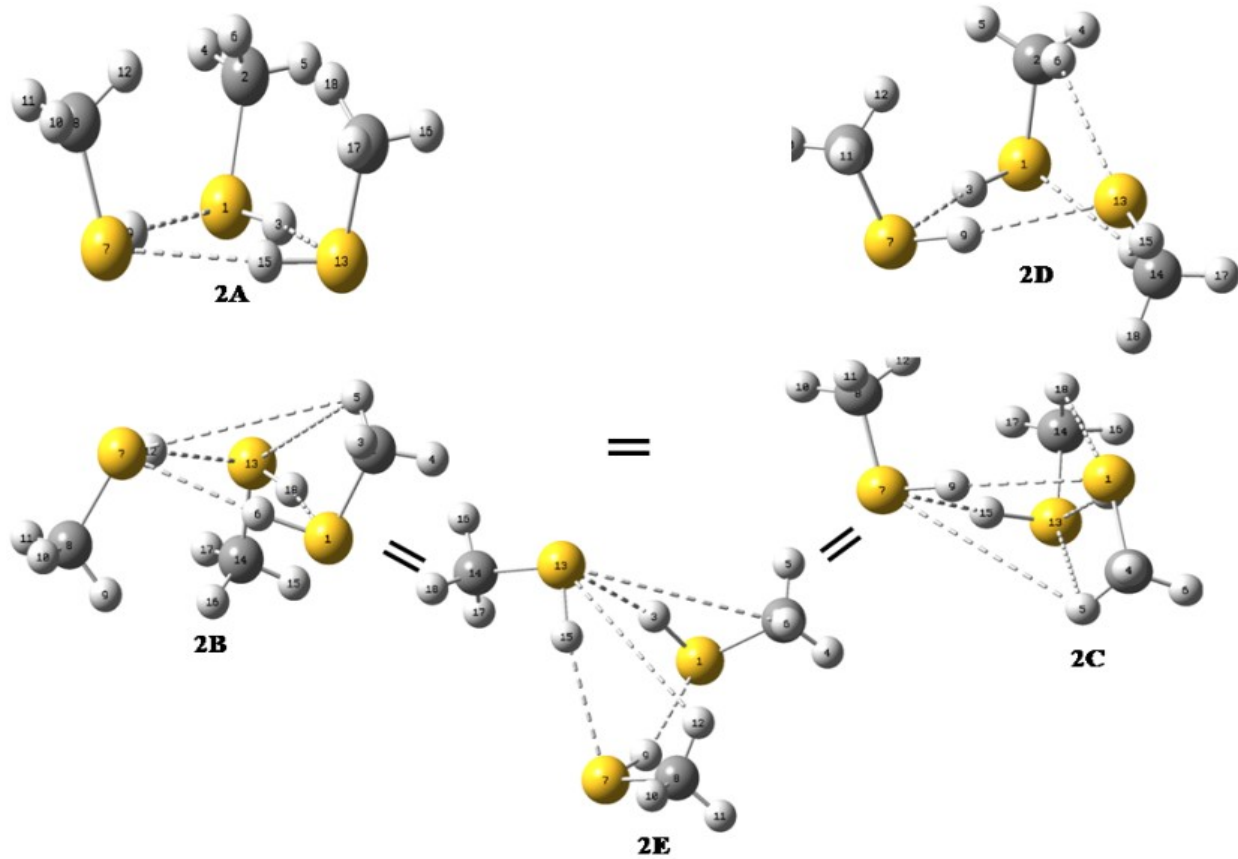

Fig. SI 2(b). Optimized geometry of the conformers of methanethiol trimer at B3LYP/cc-pVDZ

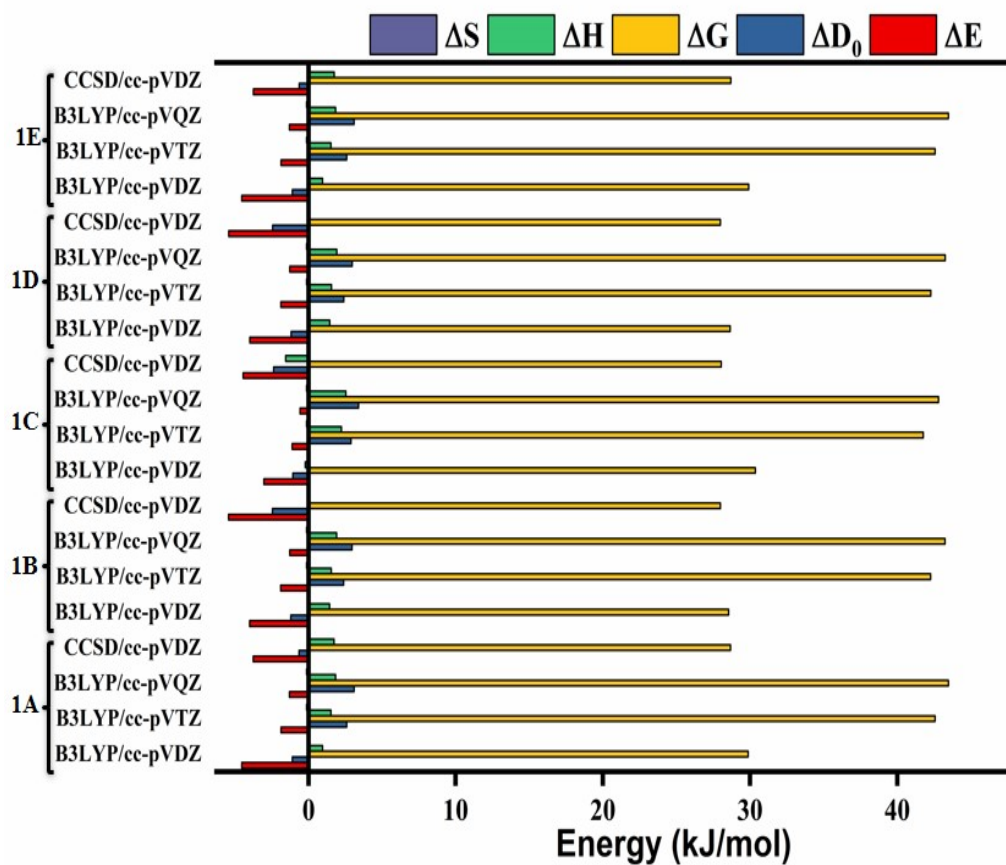

Fig. SI 3. Counterpoise corrected thermodynamic parameter of methanethiol dimer at various levels of theory and different basis sets.

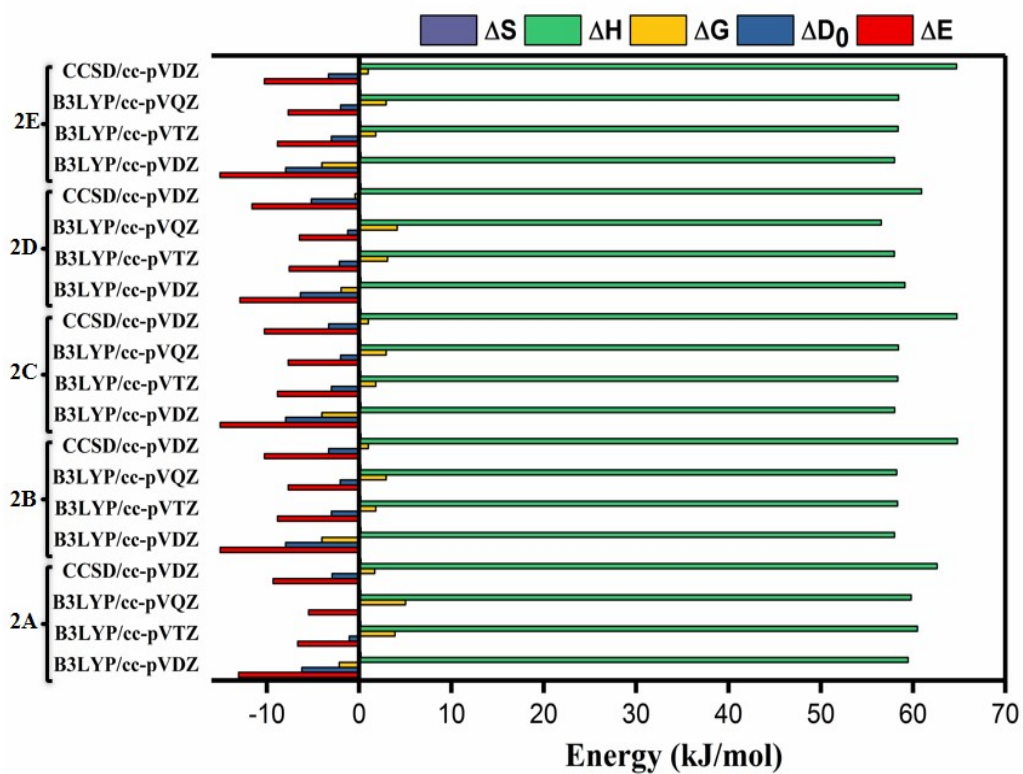

Fig. SI 4. Counterpoise corrected thermodynamic parameter of methanethiol trimer at various levels of theory and different basis sets.

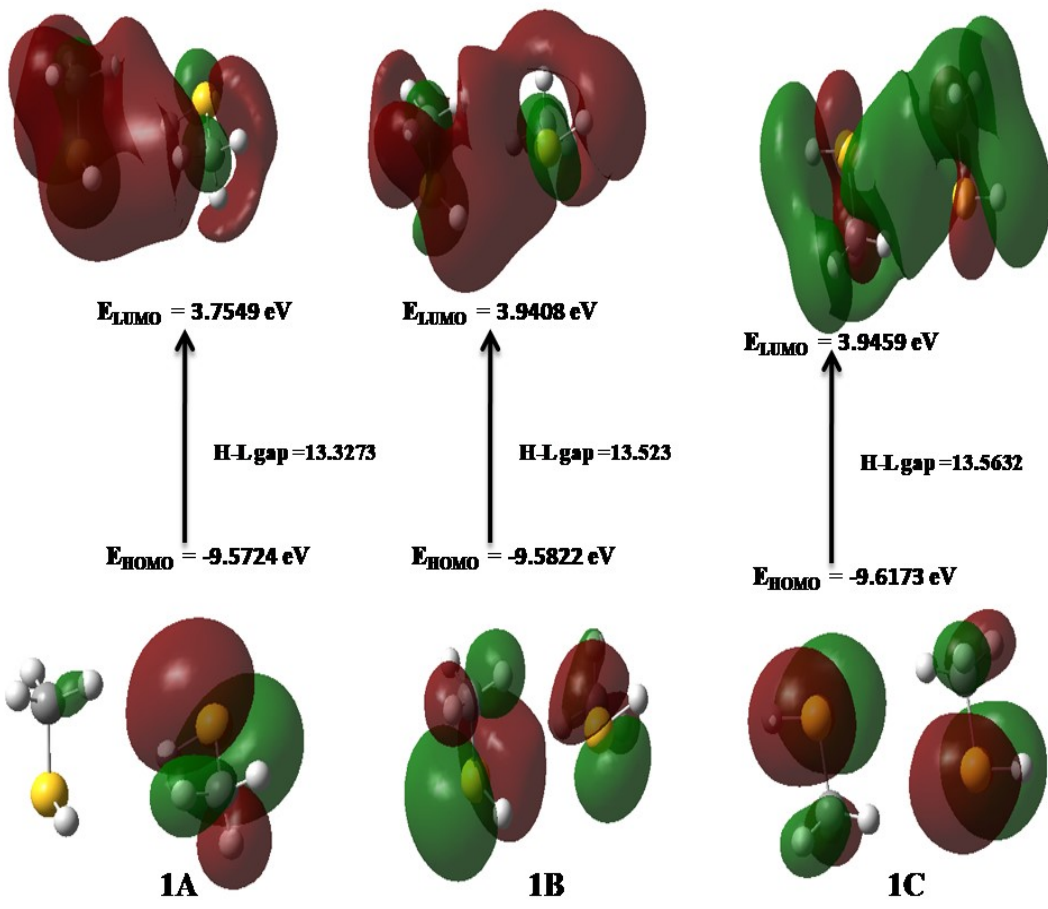

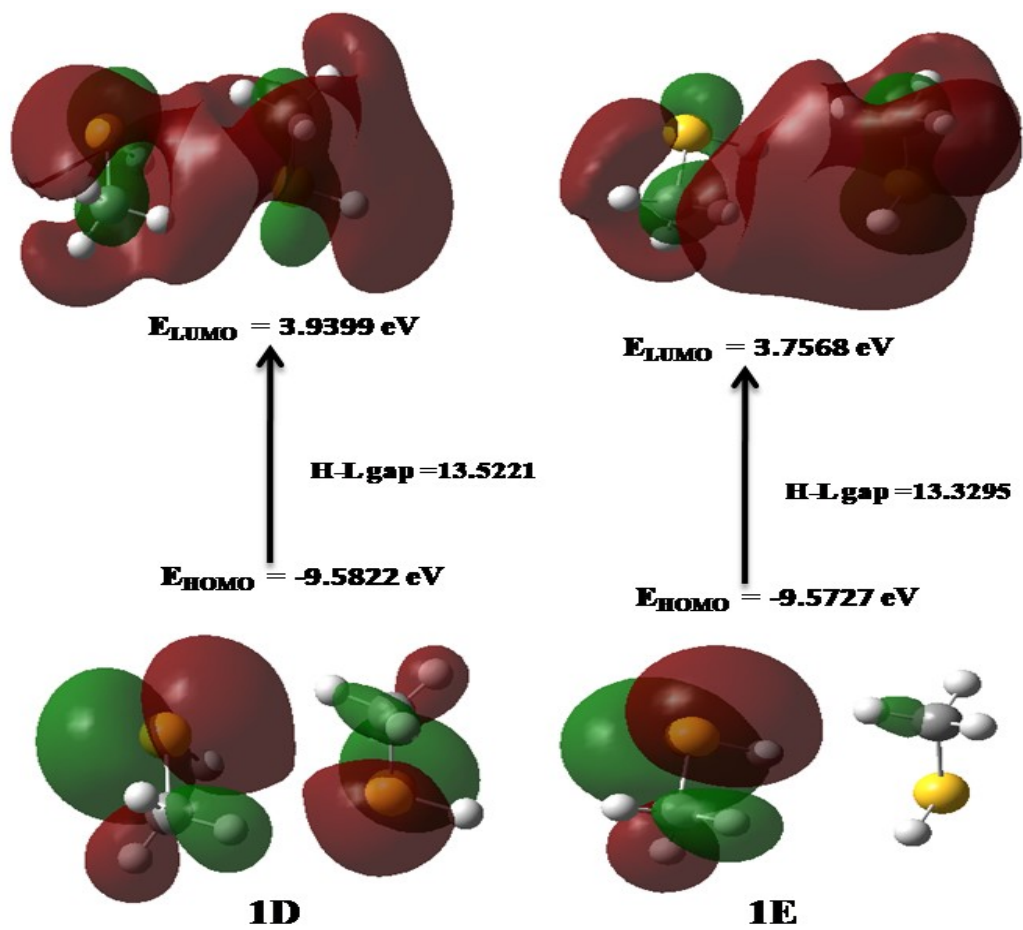

Fig. SI 5. FMO isosurface of methanethiol's dimer.

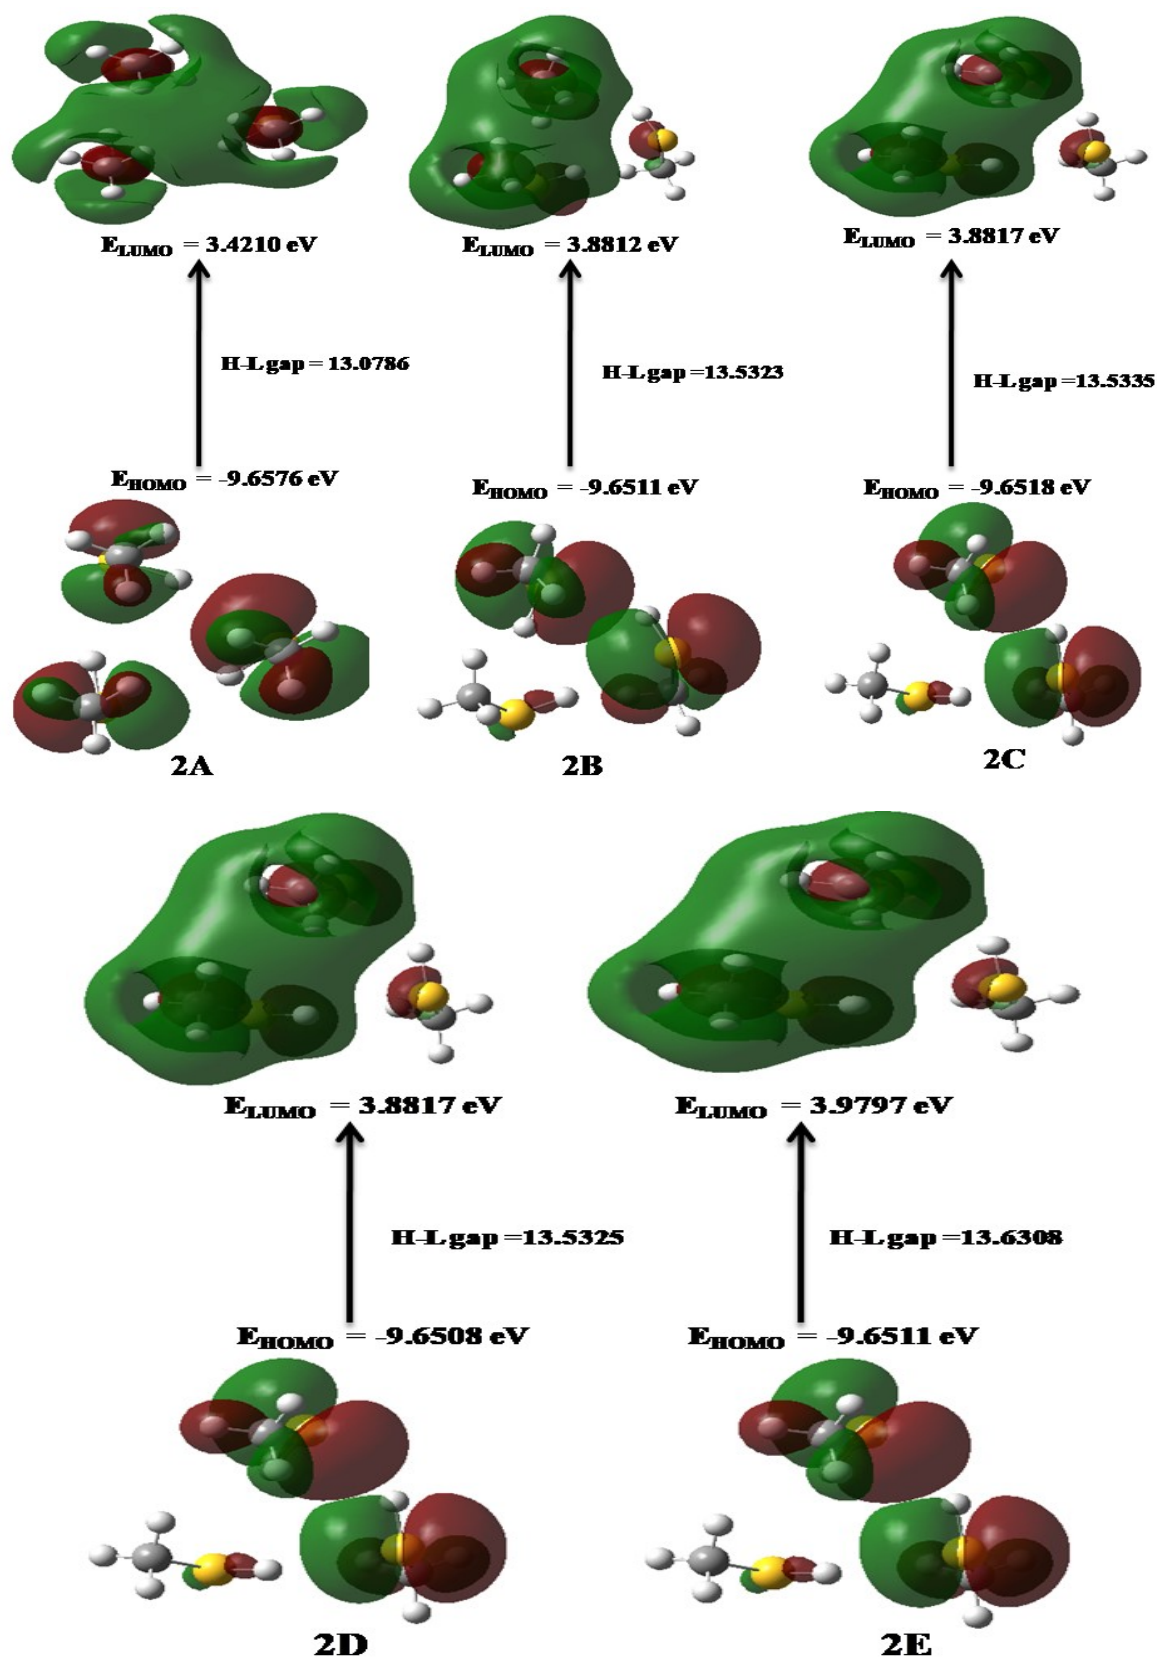

Fig. SI 6. FMO iso-surface of methanethiol trimer

Table: ST1. Optimized geometrical parameters of the methanethiol monomer (R is distance in Å,  $\Theta$  is angle in degree ( $^{\circ}$ ) and  $\mu$  is dipole moment in D)

|                  | Our calculation at B3LYP |         |         | Lago et al's calculation | Experimental Values |
|------------------|--------------------------|---------|---------|--------------------------|---------------------|
|                  | cc-pVDZ                  | cc-pVTZ | cc-pVQZ | B3LYP/cc-pVDZ            | [From Ref. 24, 25.] |
| $R_{S-C}$        | 1.84                     | 1.83    | 1.83    | 1.84                     | 1.82                |
| $R_{S-H}$        | 1.36                     | 1.34    | 1.34    | 1.36                     | 1.33                |
| $R_{C-H}$        | 1.10                     | 1.09    | 1.09    | 1.10                     | 1.10                |
| $R_{C-H}$        | 1.10                     | 1.09    | 1.09    | 1.10                     | 1.10                |
| $\Theta_{H-S-C}$ | 96.9                     | 97.1    | 97.3    | 97.0                     | 100.3               |
| $\Theta_{H-C-H}$ | 108.8                    | 108.9   | 108.8   | 109.0                    | 110.3               |
| $\Theta_{H-C-H}$ | 110.3                    | 110.4   | 110.4   | 110.5                    | 110.3               |
| $\mu$            | 1.50                     | 1.55    | 1.55    | 1.61                     | 1.52                |

Table: ST 2. Optimized geometrical parameters of dimers of methanethiol at B3LYP (R and  $r^*$  are distances in Å,  $\Theta$  is angle in degree ( $^{\circ}$ ) and  $\mu$  is dipole moments in D)

|                     | 1A      |         |         | 1B      |         |         | 1C      |         |         | 1D      |         |         | 1E      |         |         |
|---------------------|---------|---------|---------|---------|---------|---------|---------|---------|---------|---------|---------|---------|---------|---------|---------|
|                     | cc-pVDZ | cc-pVTZ | cc-pVQZ | cc-pVDZ | cc-pVTZ | cc-pVQZ | cc-pVDZ | cc-pVTZ | cc-pVQZ | cc-pVDZ | cc-pVTZ | cc-pVQZ | cc-pVDZ | cc-pVTZ | cc-pVQZ |
| $R_{C-S1}$          | 1.84    | 1.84    | 1.84    | 1.84    | 1.84    | 1.84    | 1.84    | 1.84    | 1.84    | 1.84    | 1.84    | 1.84    | 1.84    | 1.84    | 1.84    |
| $R_{H-S1}$          | 1.36    | 1.36    | 1.36    | 1.36    | 1.36    | 1.36    | 1.36    | 1.36    | 1.36    | 1.36    | 1.36    | 1.36    | 1.36    | 1.36    | 1.36    |
| $R_{C-S7}$          | 1.84    | 1.84    | 1.84    | 1.84    | 1.84    | 1.84    | 1.84    | 1.84    | 1.84    | 1.84    | 1.84    | 1.84    | 1.84    | 1.84    | 1.84    |
| $R_{H-S7}$          | 1.36    | 1.36    | 1.36    | 1.36    | 1.36    | 1.36    | 1.36    | 1.36    | 1.36    | 1.36    | 1.36    | 1.36    | 1.36    | 1.36    | 1.36    |
| $\Theta_{C-S1...S}$ | 98.1    | 98.1    | 98.1    | 77.2    | 77.2    | 77.2    | 66.4    | 66.4    | 66.4    | 75.1    | 75.1    | 75.1    | 98.3    | 98.3    | 98.3    |
| $\Theta_{C-S7...S}$ | 75.8    | 75.8    | 75.8    | 78.3    | 78.3    | 78.3    | 66.3    | 66.3    | 66.4    | 77.3    | 77.3    | 77.3    | 75.9    | 75.9    | 75.9    |
| $\Phi_{C-S...S-C}$  | 123.0   | 123.0   | 123.0   | -116.9  | -116.9  | -116.9  | 180.0   | 180.0   | 180.0   | -116.8  | -116.8  | -116.8  | -123.7  | -123.7  | -123.7  |
| $r^*_{S...S}$       | 4.06    | 4.06    | 4.06    | 3.98    | 3.98    | 3.98    | 4.41    | 4.41    | 4.41    | 3.98    | 3.98    | 3.98    | 4.06    | 4.06    | 4.06    |
| $r^*_{H...S1}$      | 3.22    | 3.22    | 3.22    | 3.14    | 3.14    | 3.14    | 4.13    | 4.13    | 4.13    | 3.17    | 3.17    | 3.17    | 3.23    | 3.23    | 3.23    |
| $r^*_{H...S7}$      | 2.80    | 2.80    | 2.80    | 3.17    | 3.17    | 3.17    | 4.13    | 4.13    | 4.13    | 3.14    | 3.14    | 3.14    | 4.36    | 4.36    | 4.36    |
| $\Theta_{X-H...S1}$ | 130.4   | 130.4   | 130.4   | 139.1   | 139.1   | 139.1   | 77.8    | 77.8    | 77.8    | 132.9   | 132.9   | 132.9   | 130.3   | 130.3   | 130.3   |
| $\Theta_{X-H...S7}$ | 152.5   | 152.5   | 152.5   | 133.1   | 133.1   | 133.1   | 77.8    | 77.8    | 77.8    | 139.0   | 139.0   | 139.0   | 100.7   | 100.7   | 100.7   |
| $\mu$               | 1.82    | 1.79    | 1.77    | 1.47    | 1.48    | 1.48    | 0.00    | 0.00    | 0.00    | 1.48    | 1.49    | 1.48    | 1.81    | 1.78    | 1.76    |



Table: ST 3. Optimized geometrical parameters of the methanethiol trimer (R and r are distances in Å,  $\Theta$  is angle in degree ( $^{\circ}$ ) and  $\mu$  is dipole moments in D))

| Geometrical Parameters | 2A    |       | 2B    |       | 2C    |       | 2D    |       | 2E    |       |
|------------------------|-------|-------|-------|-------|-------|-------|-------|-------|-------|-------|
|                        | CCSD  | B3LYP | CCSD  | B3LYP | CCSD  | B3LYP | CCSD  | B3LYP | CCSD  | B3LYP |
| $R_{S-H}$              | 1.35  | 1.36  | 1.35  | 1.36  | 1.35  | 1.36  | 1.35  | 1.36  | 1.35  | 1.36  |
|                        | 1.35  | 1.36  | 1.35  | 1.36  | 1.35  | 1.36  | 1.35  | 1.36  | 1.35  | 1.36  |
|                        | 1.35  | 1.36  | 1.35  | 1.36  | 1.35  | 1.36  | 1.35  | 1.36  | 1.35  | 1.36  |
| $r_{H...S1}$           | 2.89  | 2.77  | 2.85  | 2.73  | 2.85  | 2.73  | 3.03  | 3.01  | 3.00  | 2.77  |
|                        | -     | -     | -     | -     | 3.35  | 4.25  | -     | -     | -     | -     |
| $r_{H...S7}$           | 2.89  | 2.77  | 2.89  | 4.42  | 2.99  | 2.80  | 2.94  | 2.77  | 2.90  | 2.73  |
|                        | -     | -     | 3.82  | 2.73  | 3.24  | 4.30  | -     | -     | -     | -     |
| $r_{H...S13}$          | 2.89  | 2.77  | 2.99  | 2.77  | -     | 2.73  | 2.82  | 2.74  | 2.85  | 4.43  |
|                        | -     | -     | 3.24  | 4.30  | 3.83  | 4.42  | 3.11  | 3.46  | 4.94  | 4.26  |
|                        | -     | -     | -     | -     | 2.90  | -     | -     | -     | 3.35  | 2.73  |
| $\Theta_{X-H...S1}$    | 158.6 | 160.8 | 153.2 | 161.7 | 129.2 | 161.7 | 154.3 | 156.1 | 145.3 | 159.7 |
|                        | -     | -     | -     | -     | 153.3 | 111.1 | -     | -     | -     | -     |
| $\Theta_{X-H...S7}$    | 158.6 | 160.7 | 112.7 | 97.3  | 126.5 | 159.6 | 149.2 | 165.6 | 144.9 | 161.6 |
|                        | -     | -     | 144.9 | 161.5 | 145.5 | 110.2 | -     | -     | -     | -     |
| $\Theta_{X-H...S13}$   | 158.6 | 160.8 | 126.4 | 159.7 | 144.9 | 161.6 | 149.2 | 163.5 | 90.2  | 97.2  |
|                        | -     | -     | 145.4 | 110.2 | 112.6 | 97.2  | 149.2 | 139.5 | 153.2 | 161.7 |
|                        | -     | -     | -     | -     | -     | -     | -     | -     | 129.2 | 111.0 |
| $\mu$                  | 3.43  | 3.75  | 1.40  | 1.25  | 1.40  | 1.25  | 1.80  | 2.20  | 1.40  | 1.25  |

Table: ST 4 Selected optimized geometrical parameters of methanethiol monomer, its most stable dimer (1A&1E) and its trimer (2B, 2C and 2E) (R is distance in Å,  $\Theta$  is angle in degree ( $^{\circ}$ ) and  $\mu$  is dipole moments in D))

| Geometrical Parameters | B3LYP/cc-pVDZ |                                                                                        |                                                                                           |
|------------------------|---------------|----------------------------------------------------------------------------------------|-------------------------------------------------------------------------------------------|
|                        | Monomer       | Dimer                                                                                  | Trimer                                                                                    |
| $R_{S-C}$              | 1.837         | $R_{S1-C} = 1.83$                                                                      | $R_{S1-C2} = 1.83$                                                                        |
|                        |               | $R_{S7-C} = 1.84$                                                                      | $R_{S7-C8} = 1.83$                                                                        |
|                        |               |                                                                                        | $R_{S13-C14} = 1.83$                                                                      |
| $R_{S-H}$              | 1.358         | $R_{S1-H} = 1.36$                                                                      | $R_{S1-H3} = 1.35$                                                                        |
|                        |               | $R_{S7-H} = 1.36$                                                                      | $R_{S7-H9} = 1.35$                                                                        |
|                        |               |                                                                                        | $R_{S13-H15} = 1.35$                                                                      |
| $R_{C-H}$              | 1.099         | $R_{C3-H4} = 1.10$<br>$R_{C3-H5} = 1.10$<br>$R_{C3-H6} = 1.10$                         | $R_{C2-H4} = 1.10$<br>$R_{C2-H5} = 1.10$<br>$R_{C2-H6} = 1.10$                            |
|                        |               | $R_{C9-H10} = 1.10$<br>$R_{C9-H11} = 1.10$<br>$R_{C9-H12} = 1.10$                      | $R_{C8-H10} = 1.10$<br>$R_{C8-H11} = 1.10$<br>$R_{C8-H12} = 1.10$                         |
|                        |               |                                                                                        | $R_{C14-H16} = 1.10$<br>$R_{C14-H17} = 1.10$<br>$R_{C14-H18} = 1.10$                      |
| $\Theta_{H-C-H}$       | 108.77        | $\Theta_{4,3,5} = 35.6$<br>$\Theta_{4,3,6} = 108.8$<br>$\Theta_{6,3,5} = 109.8$        | $\Theta_{2,4,5} = 35.6$<br>$\Theta_{4,2,6} = 108.8$<br>$\Theta_{2,6,5} = 110.0$           |
|                        |               | $\Theta_{12,9,11} = 108.7$<br>$\Theta_{10,9,11} = 108.8$<br>$\Theta_{12,9,10} = 110.6$ | $\Theta_{10,8,11} = 108.7$<br>$\Theta_{10,8,12} = 108.9$<br>$\Theta_{12,8,11} = 110.0$    |
|                        |               |                                                                                        | $\Theta_{17,14,18} = 109.8$<br>$\Theta_{17,14,16} = 108.9$<br>$\Theta_{16,14,18} = 108.9$ |
| $\Theta_{H-S-C-H}$     | 180           | $\Theta_{H2-S1-C3-H4} = -177.6$                                                        | $\Theta_{H3-S1-C2-H4} = 179.2$                                                            |
|                        |               | $\Theta_{H8-S7-C9-H11} = -177.6$                                                       | $\Theta_{H9-S7-C8-H10} = 177.6$                                                           |
|                        |               |                                                                                        | $\Theta_{H15-S13-C14-H16} = -175.1$                                                       |
| $\mu$                  | 1.50 D        | 1.71 D                                                                                 | 1.40 D                                                                                    |

Table: ST 5. Relative change in vibrational frequency ( $\Delta\nu$ ) and intensity (**I**) of S-H bonds in dimer and trimer of methanethiol with respect to monomer (**I**<sub>0</sub>) ( $\Delta\nu$  in cm<sup>-1</sup>)

|                    | <b>B3LYP/cc-pVDZ</b> |                         | <b>CCSD/ cc-pVDZ</b> |                         |
|--------------------|----------------------|-------------------------|----------------------|-------------------------|
|                    | $\Delta\nu$          | <b>I/I</b> <sub>0</sub> | $\Delta\nu$          | <b>I/I</b> <sub>0</sub> |
| <b>1A (7,8)</b>    | -53.92               | 4.66                    | -3.81                | 0.63                    |
| <b>(1, 2)</b>      | -1.10                | 0.82                    | -3.23                | 0.57                    |
| <b>1B (7,8)</b>    | -2.83                | 1.47                    | -1.55                | 1.38                    |
| <b>(1,2)</b>       | 2.02                 | 0.43                    | 1.12                 | 0.40                    |
| <b>1C (7,8)</b>    | -2.12                | 2.20                    | -2.03                | 2.19                    |
| <b>(1, 2)</b>      | -2.06                | 0.00                    | -2.02                | 0.00                    |
| <b>1D (7,8)</b>    | -3.05                | 1.47                    | -1.63                | 1.38                    |
| <b>(1, 2)</b>      | 2.08                 | 0.43                    | 1.00                 | 0.40                    |
| <b>1E (12, 11)</b> | -53.81               | 4.66                    | -3.76                | 0.64                    |
| <b>(6, 5)</b>      | -1.12                | 0.82                    | -3.23                | 0.56                    |
| <b>2A (1, 3)</b>   | -79.07               | 0.05                    | -14.87               | 0.05                    |
| <b>(7, 9)</b>      | -69.60               | 12.73                   | -10.54               | 1.34                    |
| <b>(13, 15)</b>    | -68.96               | 12.71                   | -10.51               | 1.33                    |
| <b>2B (1, 3)</b>   | -90.88               | 1.80                    | -13.88               | 0.55                    |
| <b>(13, 15)</b>    | -80.98               | 15.59                   | -6.46                | 0.44                    |
| <b>(7, 9)</b>      | -90.92               | 12.00                   | -4.89                | 0.35                    |
| <b>2C (7, 9)</b>   | -90.92               | 1.82                    | -14.03               | 0.56                    |
| <b>(1, 3)</b>      | -81.01               | 15.57                   | -6.54                | 0.45                    |
| <b>(13, 15)</b>    | -72.65               | 11.99                   | -4.91                | 0.35                    |
| <b>2D (7, 9)</b>   | -72.73               | 4.95                    | -12.79               | 1.00                    |
| <b>(1, 3)</b>      | -66.08               | 11.86                   | -5.59                | 0.51                    |
| <b>(13, 15)</b>    | -0.73                | 0.91                    | -2.36                | 0.96                    |
| <b>2E (1,3)</b>    | -90.79               | 1.80                    | -14.01               | 0.56                    |
| <b>(13, 15)</b>    | -80.88               | 15.55                   | -6.46                | 0.45                    |
| <b>(7, 9)</b>      | -72.64               | 12.01                   | -4.81                | 0.34                    |

1. All frequencies are calculated by subtracting the frequency of dimer/trimer from the frequency of the monomer for the corresponding vibrational mode.
2. I is the computed IR intensity of the dimer/trimer and I<sub>0</sub> is the computed IR intensity of the monomer.

Table: ST 6. Relative change in torsion frequency HSCH in dimer and trimer of the methanethiol with respect to monomer

|                           | B3LYP       |         | CCSD        |         |
|---------------------------|-------------|---------|-------------|---------|
|                           | $\Delta\nu$ | $I/I_0$ | $\Delta\nu$ | $I/I_0$ |
| <b>1A (8, 7, 9, 11)</b>   | 26.13       | 1.75    | 17.23       | 1.42    |
| <b>(2, 1, 3, 4)</b>       | 121.71      | 1.90    | 79.36       | 1.92    |
| <b>1B (8, 7, 9, 11)</b>   | 15.38       | 1.73    | 14.13       | 1.56    |
| <b>(2, 1, 3, 4)</b>       | 19.79       | 1.06    | 17.43       | 1.21    |
| <b>1C (8, 7, 9, 11)</b>   | 4.77        | 0.00    | 6.90        | 0.00    |
| <b>(2, 1, 3, 4)</b>       | 13.87       | 1.70    | 13.10       | 1.80    |
| <b>1D (8, 7, 9, 11)</b>   | 15.63       | 1.78    | 14.43       | 1.58    |
| <b>(2, 1, 3, 4)</b>       | 20.21       | 1.02    | 17.48       | 1.19    |
| <b>1E (12, 11, 7, 10)</b> | 26.1        | 1.75    | 18.23       | 1.41    |
| <b>(6, 5, 1, 4)</b>       | 121.59      | 1.90    | 79.25       | 1.93    |
| <b>2A (9, 7, 8, 12)</b>   | -135.99     | 0.10    | -142.95     | 0.26    |
| <b>(3, 1, 2, 5)</b>       | -135.62     | 0.10    | -142.83     | 0.26    |
| <b>(15, 13, 14, 17)</b>   | -121.87     | 0.00    | -126.64     | 0.01    |
| <b>2B (3, 1, 2, 5)</b>    | -135.97     | 0.09    | -148.65     | 0.19    |
| <b>(9, 7, 8, 12)</b>      | -134.83     | 0.10    | -132.64     | 0.19    |
| <b>(15, 13, 14, 17)</b>   | -122.49     | 0.00    | -108.78     | 0.21    |
| <b>2C (9, 7, 8, 11)</b>   | -136.01     | 0.09    | -148.55     | 0.19    |
| <b>(3, 1, 2, 5)</b>       | -134.78     | 0.09    | -132.86     | 0.19    |
| <b>(15, 13, 14, 17)</b>   | -122.48     | 0.00    | -109.01     | 0.21    |
| <b>2D (9, 7, 8, 12)</b>   | -148.02     | 0.04    | -161.61     | 0.13    |
| <b>(3, 1, 2, 5)</b>       | -124.65     | 0.11    | -137.11     | 0.29    |
| <b>(15, 13, 14, 17)</b>   | -115.89     | 0.06    | -116.9      | 0.12    |
| <b>2E (9, 7, 8, 12)</b>   | -136.02     | 0.10    | -148.54     | 0.19    |
| <b>(3, 1, 2, 5)</b>       | -134.79     | 0.10    | -132.89     | 0.19    |
| <b>(15, 13, 14, 17)</b>   | -122.48     | 0.00    | -109.51     | 0.20    |

3. All frequencies are calculated by subtracting the frequency of dimer/trimer from the frequency of the monomer for the corresponding vibrational mode.
4. I is the computed IR intensity of the dimer/trimer and  $I_0$  is the computed IR intensity of the monomer.

Table: ST 7. Summary of the FMO analysis of the dimers and trimers of the methanethiol molecule. (HOMO & LUMO values are in eV)

| Conformers of dimer | HOMO      | LUMO     | Conformers of trimer | HOMO      | LUMO     |
|---------------------|-----------|----------|----------------------|-----------|----------|
| 1A                  | -9.572426 | 3.754901 | 2A                   | -9.657598 | 3.421017 |
| 1B                  | -9.582222 | 3.940755 | 2B                   | -9.651067 | 3.881162 |
| 1C                  | -9.617325 | 3.945925 | 2C                   | -9.650795 | 3.881706 |
| 1D                  | -9.582222 | 3.939939 | 2D                   | -9.650795 | 3.881706 |
| 1E                  | -9.572698 | 3.756806 | 2E                   | -9.651067 | 3.979667 |

Table: ST 8. Summary of second order perturbation theory analysis of fock matrix in NBO analysis  
Inter molecular interactions

| Dimer     |                                                            |                   |               |                    |                |
|-----------|------------------------------------------------------------|-------------------|---------------|--------------------|----------------|
| Conformer | Donor (i)                                                  | Acceptor (j)      | E(2) (kJ/mol) | E(j) – E(i) (a.u.) | F(i, j) (a.u.) |
| 1A        | <b>Intramolecular interaction in molecular unit 1</b>      |                   |               |                    |                |
|           | $\sigma$ S1-H2                                             | $\sigma^*$ C3-H4  | 2.10          | 0.97               | 0.040          |
|           | LP(2) S1                                                   | $\sigma^*$ C3-H5  | 3.66          | 0.68               | 0.045          |
|           | LP(2) S1                                                   | $\sigma^*$ C3-H6  | 4.07          | 0.68               | 0.047          |
|           | <b>Intramolecular interaction in molecular unit 2</b>      |                   |               |                    |                |
|           | $\sigma$ S7-H8                                             | $\sigma^*$ C9-H11 | 2.14          | 0.98               | 0.041          |
|           | LP(2) S7                                                   | $\sigma^*$ C9-H10 | 3.22          | 0.70               | 0.043          |
|           | LP(2) S7                                                   | $\sigma^*$ C9-H12 | 3.95          | 0.68               | 0.047          |
|           | <b>Intermolecular interaction of molecular unit 2 to 1</b> |                   |               |                    |                |
|           | LP(2) S7                                                   | $\sigma^*$ S1-H2  | 4.00          | 0.48               | 0.039          |
| 1B        | <b>Intramolecular interaction in molecular unit 1</b>      |                   |               |                    |                |
|           | $\sigma$ S1-H2                                             | $\sigma^*$ C3-H4  | 4.44          | 1.08               | 0.062          |
|           | LP(2) S1                                                   | $\sigma^*$ C3-H5  | 3.06          | 1.41               | 0.059          |
|           | LP(2) S1                                                   | $\sigma^*$ C3-H6  | 6.17          | 1.07               | 0.073          |
|           | <b>Intramolecular interaction in molecular unit 2</b>      |                   |               |                    |                |
|           | $\sigma$ S7-H8                                             | $\sigma^*$ C9-H11 | 2.93          | 1.43               | 0.058          |
|           | LP(2) S7                                                   | $\sigma^*$ C9-H10 | 5.90          | 1.07               | 0.071          |
|           | LP(2) S7                                                   | $\sigma^*$ C9-H12 | 4.85          | 1.07               | 0.064          |
| 1C        | <b>Intramolecular interaction in molecular unit 1</b>      |                   |               |                    |                |
|           | $\sigma$ S1-H2                                             | $\sigma^*$ C3-H4  | 6.12          | 1.07               | 0.072          |
|           | LP(2) S1                                                   | $\sigma^*$ C3-H5  | 2.95          | 1.42               | 0.058          |
|           | LP(2) S1                                                   | $\sigma^*$ C3-H6  | 4.64          | 1.07               | 0.063          |
|           | <b>Intramolecular interaction in molecular unit 2</b>      |                   |               |                    |                |
|           | $\sigma$ S7-H8                                             | $\sigma^*$ C9-H11 | 6.12          | 1.07               | 0.072          |
|           | LP(2) S7                                                   | $\sigma^*$ C9-H10 | 2.95          | 1.42               | 0.058          |
|           | LP(2) S7                                                   | $\sigma^*$ C9-H12 | 4.64          | 1.07               | 0.063          |
| 1D        | <b>Intramolecular interaction in molecular unit 1</b>      |                   |               |                    |                |
|           | $\sigma$ S1-H2                                             | $\sigma^*$ C3-H4  | 4.19          | 0.69               | 0.048          |
|           | LP(2) S1                                                   | $\sigma^*$ C3-H5  | 2.07          | 0.99               | 0.040          |
|           | LP(2) S1                                                   | $\sigma^*$ C3-H6  | 3.34          | 0.68               | 0.043          |
|           | <b>Intramolecular interaction in molecular unit 2</b>      |                   |               |                    |                |
|           | $\sigma$ S7-H8                                             | $\sigma^*$ C9-H11 | 2.15          | 0.97               | 0.041          |
|           | LP(2) S7                                                   | $\sigma^*$ C9-H10 | 3.09          | 0.70               | 0.042          |
|           | LP(2) S7                                                   | $\sigma^*$ C9-H12 | 4.27          | 0.69               | 0.043          |
| 1E        | <b>Intramolecular interaction in molecular unit 1</b>      |                   |               |                    |                |
|           | $\sigma$ S5-H6                                             | $\sigma^*$ C1-H3  | 3.07          | 1.41               | 0.059          |
|           | LP(2) S5                                                   | $\sigma^*$ C1-H2  | 5.17          | 1.06               | 0.066          |
|           | LP(2) S5                                                   | $\sigma^*$ C1-H4  | 5.92          | 1.06               | 0.071          |
|           | <b>Intramolecular interaction in molecular unit 2</b>      |                   |               |                    |                |
|           | $\sigma$ S11-H12                                           | $\sigma^*$ C7-H10 | 3.03          | 1.41               | 0.058          |
|           | LP(2) S11                                                  | $\sigma^*$ C7-H8  | 4.94          | 1.08               | 0.066          |
|           | LP(2) S11                                                  | $\sigma^*$ C7-H9  | 5.58          | 1.07               | 0.069          |

|                                                            |                                                            |                    |      |       |       |
|------------------------------------------------------------|------------------------------------------------------------|--------------------|------|-------|-------|
|                                                            | <b>Intermolecular interaction of molecular unit 2 to 1</b> |                    |      |       |       |
|                                                            | LP(2) S11                                                  | $\sigma^*$ S5-H6   | 2.59 | 0.83  | 0.042 |
|                                                            | <b>Trimer</b>                                              |                    |      |       |       |
| 2A                                                         | <b>Intramolecular interaction in molecular unit 1</b>      |                    |      |       |       |
|                                                            | $\sigma$ S1-H3                                             | $\sigma^*$ C2-H4   | 2.08 | 0.97  | 0.040 |
|                                                            | LP(2) S1                                                   | $\sigma^*$ C2-H5   | 4.48 | 0.69  | 0.050 |
|                                                            | LP(2) S1                                                   | $\sigma^*$ C2-H6   | 2.77 | 0.69  | 0.039 |
|                                                            | <b>Intramolecular interaction in molecular unit 2</b>      |                    |      |       |       |
|                                                            | $\sigma$ S7-H9                                             | $\sigma^*$ C8-H10  | 2.08 | 0.97  | 0.40  |
|                                                            | LP(2) S7                                                   | $\sigma^*$ C8-H11  | 4.48 | 0.69  | 0.050 |
|                                                            | LP(2) S7                                                   | $\sigma^*$ C8-H12  | 2.77 | 0.69  | 0.039 |
|                                                            | <b>Intramolecular interaction in molecular unit 3</b>      |                    |      |       |       |
|                                                            | $\sigma$ S13-H15                                           | $\sigma^*$ C14-H16 | 2.08 | 0.97  | 0.40  |
|                                                            | LP(2) S13                                                  | $\sigma^*$ C14-H17 | 4.48 | 0.69  | 0.050 |
|                                                            | LP(2) S13                                                  | $\sigma^*$ C14-H18 | 2.77 | 0.69  | 0.039 |
|                                                            | <b>Intermolecular interaction of molecular unit 1 to 2</b> |                    |      |       |       |
|                                                            | LP(2) S1                                                   | $\sigma^*$ S7-H9   | 4.85 | 0.48  | 0.043 |
|                                                            | <b>Intermolecular interaction of molecular unit 2 to 3</b> |                    |      |       |       |
| LP(2) S7                                                   | $\sigma^*$ S13-H15                                         | 4.83               | 0.48 | 0.043 |       |
| <b>Intermolecular interaction of molecular unit 3 to 1</b> |                                                            |                    |      |       |       |
| LP(2) S13                                                  | $\sigma^*$ S1-H3                                           | 4.85               | 0.48 | 0.043 |       |
| 2B                                                         | <b>Intramolecular interaction in molecular unit 1</b>      |                    |      |       |       |
|                                                            | $\sigma$ S1-H9                                             | $\sigma^*$ C2-H4   | 2.04 | 0.98  | 0.040 |
|                                                            | LP(2) S1                                                   | $\sigma^*$ C2-H3   | 4.40 | 0.70  | 0.050 |
|                                                            | LP(2) S1                                                   | $\sigma^*$ C2-H5   | 2.74 | 0.70  | 0.039 |
|                                                            | <b>Intramolecular interaction in molecular unit 2</b>      |                    |      |       |       |
|                                                            | $\sigma$ S7-H12                                            | $\sigma^*$ C8-H10  | 2.06 | 0.98  | 0.040 |
|                                                            | LP(2) S7                                                   | $\sigma^*$ C8-H9   | 2.83 | 0.69  | 0.040 |
|                                                            | LP(2) S7                                                   | C8-H11             | 4.39 | 0.69  | 0.050 |
|                                                            | <b>Intramolecular interaction in molecular unit 3</b>      |                    |      |       |       |
|                                                            | $\sigma$ S13-H118                                          | $\sigma^*$ C14-H17 | 2.05 | 0.97  | 0.040 |
|                                                            | LP(2) S13                                                  | $\sigma^*$ C14-H15 | 4.49 | 0.70  | 0.050 |
|                                                            | LP(2) S13                                                  | $\sigma^*$ C14-H16 | 2.68 | 0.69  | 0.039 |
|                                                            | <b>Intermolecular interaction of molecular unit 1 to 3</b> |                    |      |       |       |
|                                                            | LP(2) S1                                                   | $\sigma^*$ S13-H18 | 5.54 | 0.48  | 0.046 |
|                                                            | <b>Intermolecular interaction of molecular unit 2 to 1</b> |                    |      |       |       |
| LP(2) S7                                                   | $\sigma^*$ S1-H6                                           | 5.51               | 0.48 | 0.046 |       |
| <b>Intermolecular interaction of molecular unit 3 to 2</b> |                                                            |                    |      |       |       |
| LP(2) S13                                                  | $\sigma^*$ S7-H12                                          | 4.81               | 0.48 | 0.043 |       |
| 2C                                                         | <b>Intramolecular interaction in molecular unit 1</b>      |                    |      |       |       |
|                                                            | $\sigma$ S1-H3                                             | $\sigma^*$ C2-H4   | 2.04 | 0.98  | 0.040 |
|                                                            | LP(2) S1                                                   | $\sigma^*$ C2-H5   | 2.74 | 0.70  | 0.039 |
|                                                            | LP(2) S1                                                   | $\sigma^*$ C2-H6   | 4.39 | 0.70  | 0.050 |
|                                                            | <b>Intramolecular interaction in molecular unit 2</b>      |                    |      |       |       |
|                                                            | $\sigma$ S7-H3                                             | $\sigma^*$ C8-H10  | 2.05 | 0.98  | 0.040 |
|                                                            | LP(2) S7                                                   | $\sigma^*$ C8-H11  | 4.49 | 0.70  | 0.050 |
|                                                            | LP(2) S7                                                   | $\sigma^*$ C8-H12  | 2.67 | 0.69  | 0.039 |
|                                                            | <b>Intramolecular interaction in molecular unit 3</b>      |                    |      |       |       |

|           |                                                            |                    |      |       |       |
|-----------|------------------------------------------------------------|--------------------|------|-------|-------|
|           | $\sigma$ S13-H15                                           | $\sigma^*$ C14-H16 | 2.06 | 0.98  | 0.040 |
|           | LP(2) S13                                                  | $\sigma^*$ C14-H17 | 4.39 | 0.69  | 0.050 |
|           | LP(2) S13                                                  | $\sigma^*$ C14-H18 | 2.83 | 0.69  | 0.040 |
|           | <b>Intermolecular interaction of molecular unit 1 to 2</b> |                    |      |       |       |
|           | LP(2) S1                                                   | $\sigma^*$ S7-H9   | 5.53 | 0.48  | 0.046 |
|           | <b>Intermolecular interaction of molecular unit 2 to 3</b> |                    |      |       |       |
|           | LP(2) S7                                                   | $\sigma^*$ S13-H15 | 4.80 | 0.48  | 0.043 |
|           | <b>Intermolecular interaction of molecular unit 3 to 1</b> |                    |      |       |       |
|           | LP(2) S13                                                  | $\sigma^*$ S1-H3   | 5.51 | 0.48  | 0.046 |
| 2D        | <b>Intramolecular interaction in molecular unit 1</b>      |                    |      |       |       |
|           | $\sigma$ S1-H3                                             | $\sigma^*$ C2-H4   | 2.08 | 0.97  | 0.040 |
|           | LP(2) S1                                                   | $\sigma^*$ C2-H5   | 4.31 | 0.68  | 0.049 |
|           | LP(2) S1                                                   | $\sigma^*$ C2-H6   | 3.22 | 0.69  | 0.042 |
|           | <b>Intramolecular interaction in molecular unit 2</b>      |                    |      |       |       |
|           | $\sigma$ S7-H9                                             | $\sigma^*$ C8-H10  | 2.06 | 0.98  | 0.040 |
|           | LP(2) S7                                                   | $\sigma^*$ C8-H11  | 4.53 | 0.69  | 0.050 |
|           | LP(2) S7                                                   | $\sigma^*$ C8-H12  | 2.67 | 0.70  | 0.039 |
|           | <b>Intramolecular interaction in molecular unit 3</b>      |                    |      |       |       |
|           | LP(2) S13                                                  | $\sigma^*$ C14-H17 | 4.50 | 0.71  | 0.051 |
|           | LP(2) S13                                                  | $\sigma^*$ C14-H18 | 2.12 | 0.71  | 0.035 |
|           | <b>Intermolecular interaction of molecular unit 1 to 3</b> |                    |      |       |       |
|           | LP(2) S1                                                   | $\sigma^*$ C14-H16 | 2.03 | 0.69  | 0.042 |
|           | <b>Intermolecular interaction of molecular unit 2 to 1</b> |                    |      |       |       |
|           | LP(2) S7                                                   | $\sigma^*$ S1-H3   | 5.00 | 0.49  | 0.044 |
|           | <b>Intermolecular interaction of molecular unit 3 to 2</b> |                    |      |       |       |
| LP(2) S13 | $\sigma^*$ S7-H9                                           | 5.33               | 0.50 | 0.046 |       |
| 2E        | <b>Intramolecular interaction in molecular unit 1</b>      |                    |      |       |       |
|           | $\sigma$ S1-H3                                             | $\sigma^*$ C2-H4   | 2.05 | 0.97  | 0.040 |
|           | LP(2) S1                                                   | $\sigma^*$ C2-H5   | 4.49 | 0.70  | 0.050 |
|           | LP(2) S1                                                   | $\sigma^*$ C2-H6   | 2.67 | 0.69  | 0.039 |
|           | <b>Intramolecular interaction in molecular unit 2</b>      |                    |      |       |       |
|           | $\sigma$ S7-H3                                             | $\sigma^*$ C8-H10  | 2.06 | 0.98  | 0.040 |
|           | LP(2) S7                                                   | $\sigma^*$ C8-H11  | 4.39 | 0.69  | 0.050 |
|           | LP(2) S7                                                   | $\sigma^*$ C8-H12  | 2.83 | 0.69  | 0.040 |
|           | <b>Intramolecular interaction in molecular unit 3</b>      |                    |      |       |       |
|           | $\sigma$ S13-H3                                            | $\sigma^*$ C14-H16 | 2.04 | 0.98  | 0.040 |
|           | LP(2) S13                                                  | $\sigma^*$ C14-H17 | 2.74 | 0.70  | 0.039 |
|           | LP(2) S13                                                  | $\sigma^*$ C14-H18 | 4.40 | 0.70  | 0.050 |
|           | <b>Intermolecular interaction of molecular unit 1 to 2</b> |                    |      |       |       |
|           | LP(2) S1                                                   | $\sigma^*$ S7-H9   | 4.80 | 0.48  | 0.043 |
|           | <b>Intermolecular interaction of molecular unit 3 to 1</b> |                    |      |       |       |
|           | LP(2) S13                                                  | $\sigma^*$ S1-H3   | 5.53 | 0.48  | 0.046 |

Table: ST 9. Absolute values of the S-H vibrational frequencies at different levels of theory. All frequencies are given in  $\text{cm}^{-1}$

| S-H vibration mode           | B3LYP/cc-pVDZ  |        | B3LYP/cc-pVTZ |        | B3LYP/cc-pVQZ |        | CCSD/cc-pVDZ |       | Exp.        |
|------------------------------|----------------|--------|---------------|--------|---------------|--------|--------------|-------|-------------|
|                              | $\nu$          | I      | $\nu$         | I      | $\nu$         | I      | $\nu$        | I     |             |
| <b>1A and 1E</b><br>(7,8)    | <b>2599.43</b> | 45.13  | 2523.39       | 51.99  | 2507.78       | 57.01  | 2729.78      | 7.51  | <b>2601</b> |
| (1, 2)                       | 2652.25        | 8.00   | 2575.97       | 4.84   | 2560.67       | 3.34   | 2730.36      | 6.80  |             |
| <b>1B and 1D</b><br>(7,8)    | 2650.52        | 14.30  | 2575.09       | 9.39   | 2559.79       | 7.3412 | 2732.04      | 16.50 |             |
| (1,2)                        | 2655.37        | 419    | 2578.79       | 2.1675 | 2562.92       | 0.9326 | 2734.71      | 4.83  |             |
| <b>1C</b> (7,8)              | 2651.23        | 21.30  | 2575.78       | 0.00   | 2560.58       | 0.00   | 2731.56      | 26.26 |             |
| (1, 2)                       | 2651.29        | 0.00   | 2575.81       | 12.47  | 2560.61       | 8.57   | 2731.57      | 0.00  |             |
| <b>2A</b> (1, 3)             | <b>2574.28</b> | 0.49   | 2616.32       | 0.13   | 2620.16       | 0.12   | 2718.72      | 0.61  | <b>2567</b> |
| (7, 9)                       | 2583.75        | 123.46 | 2621.01       | 74.80  | 2624.17       | 72.92  | 2723.05      | 16.00 |             |
| (13, 15)                     | 2584.39        | 123.26 | 2621.30       | 74.85  | 2624.40       | 72.81  | 2723.08      | 16.00 |             |
| <b>2B, 2C, and 2E</b> (1, 6) | 2562.47        | 17.48  | 2604.16       | 24.70  | 2608.25       | 30.35  | 2719.71      | 6.64  |             |
| (13, 18)                     | 2572.37        | 151.17 | 2609.30       | 100.23 | 2613.22       | 93.21  | 2727.13      | 5.31  |             |
| (7, 12)                      | 2580.71        | 116.24 | 2621.26       | 57.99  | 2625.09       | 54.17  | 2728.70      | 4.16  |             |
| <b>2D</b> (7, 9)             | 2580.62        | 47.99  | 2615.43       | 34.07  | 2617.12       | 41.74  | 2720.80      | 11.86 |             |
| (1, 3)                       | 2587.27        | 114.99 | 2619.08       | 80.55  | 2620.79       | 77.03  | 2728.00      | 6.15  |             |
| (13, 15)                     | 2652.02        | 8.88   | 2670.44       | 4.91   | 2670.14       | 3.21   | 2731.23      | 11.46 |             |

Table: ST 10. Topological parameters for bonds of interacting atoms: electron density ( $\rho_{\text{BCP}}$ ), Laplacian of electron density ( $\nabla^2 \rho_{\text{BCP}}$ ), kinetic electron energy density ( $G_{\text{BCP}}$ ), potential electron energy density ( $V_{\text{BCP}}$ ), total electron energy density ( $H_{\text{BCP}}$ ), estimated interaction energy ( $E_{\text{int}}$ ) at bond critical point (BCP)

| Dimer   |                       |                            |                                     |                         |                         |                         |                             |
|---------|-----------------------|----------------------------|-------------------------------------|-------------------------|-------------------------|-------------------------|-----------------------------|
| Confor. | Critical point number | $\rho_{\text{BCP}}$ (a.u.) | $\nabla^2 \rho_{\text{BCP}}$ (a.u.) | $G_{\text{BCP}}$ (a.u.) | $V_{\text{BCP}}$ (a.u.) | $H_{\text{BCP}}$ (a.u.) | $E_{\text{int}}$ (kcal/mol) |
| 1A      | 19(CH- -S)            | 0.007675                   | 0.019130                            | 0.004387                | -0.003992               | 0.000395                | 1.253                       |
|         | 24(SH- -S)            | 0.002562                   | 0.015372                            | 0.003230                | -0.000262               | 0.000613                | 0.821                       |
| 1B      | 4(CH- -S)             | 0.005405                   | 0.015802                            | 0.003412                | -0.002874               | 0.000528                | 0.902                       |
|         | 8(SH- -S)             | 0.003768                   | 0.011871                            | 0.002417                | -0.001867               | 0.005504                | 0.586                       |
|         | 13(CH- -S)            | 0.006043                   | 0.016176                            | 0.003590                | -0.003135               | 0.000454                | 0.984                       |
| 1C      | 9(CH- -S)             | 0.005072                   | 0.014728                            | 0.003130                | -0.002578               | 0.000552                | 0.809                       |
|         | 4(CH- -S)             | 0.005072                   | 0.014728                            | 0.003130                | -0.002578               | 0.000552                | 0.809                       |
| 1D      | 4(CH- -S)             | 0.005407                   | 0.015807                            | 0.003413                | -0.002875               | 0.000538                | 0.902                       |
|         | 8(SH- -S)             | 0.003763                   | 0.011860                            | 0.002415                | -0.001865               | 0.000550                | 0.585                       |
|         | 13(SH- -C)            | 0.006049                   | 0.016186                            | 0.003592                | -0.003138               | 0.000454                | 0.985                       |
| 1E      | 13(CH- -S)            | 0.007669                   | 0.019118                            | 0.004384                | -0.003989               | 0.000395                | 1.252                       |
|         | 15(SH- -S)            | 0.005124                   | 0.015372                            | 0.003230                | -0.002617               | 0.000613                | 0.821                       |
| Trimer  |                       |                            |                                     |                         |                         |                         |                             |
| 2A      | 7((CH- -HC)           | 0.002358                   | 0.009885                            | 0.001816                | -0.001160               | 0.000655                | 0.364                       |



|    |             |          |          |          |           |           |            |
|----|-------------|----------|----------|----------|-----------|-----------|------------|
|    | 8(SH- -S)   | 0.008447 | 0.019123 | 0.004539 | -0.004298 | 0.000242  | 1.349      |
|    | 10(CH- -HC) | 0.002368 | 0.009924 | 0.001824 | -0.001167 | 0.000657  | 0.366      |
|    | 16(CH- -HC) | 0.002360 | 0.009895 | 0.001818 | -0.001162 | 0.000656  | 0.365      |
|    | 17(SH- -S)  | 0.008451 | 0.019130 | 0.004541 | -0.004300 | 0.000241  | 1.349      |
|    | 20(SH- -S)  | 0.008447 | 0.019123 | 0.004539 | -0.004298 | 0.000242  | 1.349      |
| 2B | 19(SH- -S)  | 0.009036 | 0.021120 | 0.005007 | -0.004733 | 0.000273  | 1.485      |
|    | 22(CH- -HC) | 0.002678 | 0.011446 | 0.002095 | -0.001329 | 0.000766  | 0.417      |
|    | 23(SH- -S)  | 0.007256 | 0.017466 | 0.004007 | -0.003647 | 0.000360  | 1.144      |
|    | 24(SH- -S)  | 0.008500 | 0.020637 | 0.004812 | -0.004464 | 0.000348  | 1.401      |
| 2C | 6(SH- -S)   | 0.009041 | 0.021121 | 0.005008 | -0.004736 | 0.000272  | 1.486      |
|    | 14(CH- -HC) | 0.002666 | 0.011395 | 0.002086 | -0.001322 | 0.000763  | 0.415      |
|    | 15(SH- -S)  | 0.007279 | 0.017512 | 0.004019 | -0.003660 | 0.000359  | 1.148      |
|    | 16(SH- -S)  | 0.008502 | 0.020635 | 0.004812 | -0.004465 | 0.000347  | 1.401      |
| 2D | 7(SH- -S)   | 0.380863 | -12.0882 | 0.006628 | -3.035302 | -3.028673 | 952.341    |
|    | 10(CH- -HC) | 120.6446 | 666646.6 | 5.189772 | -166672.0 | -166666.8 | 52294140.5 |
|    | 12(SH- -S)  | 0.379907 | -12.0370 | 0.006653 | -3.022550 | -3.015897 | 948.340    |
|    | 14(SH- -S)  | 0.381102 | -12.1061 | 0.006623 | -3.039763 | -3.033140 | 953.740    |
|    | 20(CH- -HC) | 0.001891 | 0.007797 | 0.001478 | -0.001007 | 0.000471  | 0.316      |
| 2E | 6(SH- -S)   | 0.009030 | 0.021103 | 0.005003 | -0.004730 | 0.000273  | 1.484      |
|    | 13(CH- -HC) | 0.002652 | 0.011340 | 0.002075 | -0.001314 | 0.000760  | 0.412      |
|    | 14(SH- -S)  | 0.007253 | 0.017470 | 0.004007 | -0.003646 | 0.000361  | 1.144      |
|    | 15(SH- -S)  | 0.008494 | 0.020619 | 0.004808 | -0.004461 | 0.000347  | 1.400      |

[Note: Topological results also confirms the similarity of the conformers 1A and 1E; 1B and 1D; 2B, 2C, and 2E. But the BCP number is different correspond to each conformer that is why we provide topological results in to separate column.]

Table: ST11. Thermodynamic parameters of different conformers of dimer and trimer of the methanethiol molecule

| Dimer     |               |                    |               |                    |                    |                    |
|-----------|---------------|--------------------|---------------|--------------------|--------------------|--------------------|
|           | Methods       | $\Delta E$ kJ/mol. | $D_0$ kJ/mol. | $\Delta G$ kJ/mol. | $\Delta H$ kJ/mol. | $\Delta S$ kJ/mol. |
| 1A and 1E | B3LYP/cc-pVDZ | -4.54              | -1.10         | 29.87              | 0.96               | -0.10              |
|           | B3LYP/cc-pVTZ | -1.87              | 2.60          | 42.57              | 1.53               | -0.14              |
|           | B3LYP/cc-pVQZ | -1.30              | 3.10          | 43.48              | 1.85               | -0.14              |
|           | B3LYP/CBS     | -0.88              | 3.46          | 44.14              | 2.08               | -0.14              |
|           | CCSD/cc-pVDZ  | -3.76              | -0.65         | 28.67              | 1.74               | -0.09              |
| 1B and 1D | B3LYP/cc-pVDZ | -4.00              | -1.20         | 28.54              | 1.44               | -0.09              |
|           | B3LYP/cc-pVTZ | -1.89              | 2.39          | 42.27              | 1.56               | -0.14              |
|           | B3LYP/cc-pVQZ | -1.28              | 2.96          | 43.25              | 1.92               | -0.14              |
|           | B3LYP/CBS     | -0.83              | 3.38          | 43.97              | 2.18               | -0.14              |
|           | CCSD/cc-pVDZ  | -4.49              | -2.45         | 27.98              | 0.06               | -0.09              |
| 1C        | B3LYP/cc-pVDZ | -3.03              | -1.07         | 30.36              | -0.23              | -0.10              |
|           | B3LYP/cc-pVTZ | -1.11              | 2.89          | 41.77              | 2.24               | -0.13              |
|           | B3LYP/cc-pVQZ | -0.58              | 3.41          | 42.80              | 2.54               | -0.14              |
|           | B3LYP/CBS     | -0.19              | 3.79          | 43.55              | 2.76               | -0.15              |
|           | CCSD/cc-pVDZ  | -4.44              | -2.37         | 28.04              | -1.56              | -0.10              |
| Trimer    |               |                    |               |                    |                    |                    |
| 2A        | B3LYP/cc-pVDZ | -13.07             | -6.22         | -2.16              | 59.46              | 0.21               |
|           | B3LYP/cc-pVTZ | -6.66              | -1.06         | 3.89               | 60.49              | 0.19               |

|                                  |               |        |       |       |       |      |
|----------------------------------|---------------|--------|-------|-------|-------|------|
|                                  | B3LYP/cc-pVQZ | -5.48  | -0.14 | 5.02  | 59.8  | 0.18 |
|                                  | B3LYP/CBS     | -4.62  | 0.53  | 5.84  | 59.30 | 0.17 |
|                                  | CCSD/cc-pVDZ  | -9.33  | -2.93 | 1.69  | 62.62 | 0.20 |
| <b>2B,<br/>2C<br/>and<br/>2E</b> | B3LYP/cc-pVDZ | -15.07 | -7.97 | -4.04 | 57.99 | 0.21 |
|                                  | B3LYP/cc-pVTZ | -8.85  | -3.00 | 1.81  | 58.33 | 0.19 |
|                                  | B3LYP/cc-pVQZ | -7.69  | -2.04 | 2.93  | 58.23 | 0.19 |
|                                  | B3LYP/CBS     | -6.84  | -1.34 | 3.75  | 58.16 | 0.19 |
|                                  | CCSD/cc-pVDZ  | -10.27 | -3.3  | 0.99  | 64.8  | 0.21 |
| <b>2D</b>                        | B3LYP/cc-pVDZ | -12.93 | -6.38 | -1.95 | 59.12 | 0.20 |
|                                  | B3LYP/cc-pVTZ | -7.59  | -2.13 | 3.07  | 57.96 | 0.18 |
|                                  | B3LYP/cc-pVQZ | -6.48  | -1.24 | 4.12  | 56.54 | 0.18 |
|                                  | B3LYP/CBS     | -5.67  | -0.59 | 4.89  | 55.50 | 0.18 |
|                                  | CCSD/cc-pVDZ  | -11.61 | -5.19 | -0.45 | 60.92 | 0.21 |

Note: - Z-matrix of the optimized geometries of the methanethiol cluster at CCSD/cc-pVDZ level of theory

### Monomer

Symbolic Z-matrix:

Charge = 0 Multiplicity = 1

|   |          |          |          |
|---|----------|----------|----------|
| C | 0.04791  | 1.15862  | 0.       |
| H | 1.09202  | 1.4609   | 0.       |
| H | -0.43099 | 1.55252  | 0.89181  |
| H | -0.43099 | 1.55252  | -0.89181 |
| S | 0.04791  | -0.66753 | 0.       |
| H | -1.28404 | -0.83712 | 0.       |

### Dimer

| 1A                          |          |          |          | 1B                          |          |          |          | 1C                          |          |          |          | 1D                          |          |          |          |
|-----------------------------|----------|----------|----------|-----------------------------|----------|----------|----------|-----------------------------|----------|----------|----------|-----------------------------|----------|----------|----------|
| Symbolic Z-matrix:          |          |          |          | Symbolic Z-matrix:          |          |          |          | Symbolic Z-matrix:          |          |          |          | Symbolic Z-matrix:          |          |          |          |
| Charge = 0 Multiplicity = 1 |          |          |          | Charge = 0 Multiplicity = 1 |          |          |          | Charge = 0 Multiplicity = 1 |          |          |          | Charge = 0 Multiplicity = 1 |          |          |          |
| S                           | 1.80964  | 0.63013  | -0.3411  | S                           | -1.94593 | 0.6054   | -0.31355 | S                           | 2.10164  | -0.49592 | -0.28156 | S                           | 1.85594  | -0.5685  | -0.34799 |
| H                           | 0.65051  | 0.01184  | -0.7034  | H                           | -1.2726  | 0.13319  | -1.39453 | H                           | 3.29138  | -0.47535 | 0.36027  | H                           | 3.13406  | -0.98249 | -0.14592 |
| C                           | 2.57623  | -0.81531 | 0.49435  | C                           | -2.00087 | -0.97853 | 0.61877  | C                           | 1.76382  | 1.30089  | -0.1647  | C                           | 1.96298  | 1.00135  | 0.59979  |
| H                           | 3.54598  | -0.47023 | 0.88062  | H                           | -0.9868  | -1.36227 | 0.79656  | H                           | 2.5013   | 1.88537  | -0.73825 | H                           | 2.68189  | 1.69511  | 0.14153  |
| H                           | 1.96332  | -1.16351 | 1.33802  | H                           | -2.47626 | -0.74709 | 1.58271  | H                           | 0.76189  | 1.45473  | -0.59647 | H                           | 0.95396  | 1.43556  | 0.55381  |
| H                           | 2.74918  | -1.63894 | -0.21299 | H                           | -2.60956 | -1.72662 | 0.09154  | H                           | 1.74802  | 1.63661  | 0.88475  | H                           | 2.22763  | 0.81431  | 1.65001  |
| S                           | -2.04283 | -0.64698 | -0.30887 | S                           | 1.85717  | -0.56872 | -0.34718 | S                           | -2.10164 | 0.49592  | 0.28156  | S                           | -1.9441  | 0.60542  | -0.31458 |
| H                           | -1.64863 | -1.3836  | 0.76242  | H                           | 3.13733  | -0.97801 | -0.14867 | H                           | -3.29138 | 0.47535  | -0.36027 | H                           | -1.26825 | 0.13087  | -1.39295 |
| C                           | -2.10242 | 0.97835  | 0.54867  | C                           | 1.96219  | 1.00266  | 0.5985   | C                           | -1.76382 | -1.30089 | 0.1647   | C                           | -2.00269 | -0.97698 | 0.62     |
| H                           | -1.10232 | 1.27736  | 0.89292  | H                           | 2.67806  | 1.69767  | 0.13747  | H                           | -0.76189 | -1.45473 | 0.59647  | H                           | -0.98952 | -1.36162 | 0.80102  |
| H                           | -2.45476 | 1.70112  | -0.20101 | H                           | 0.95192  | 1.43407  | 0.55488  | H                           | -2.5013  | -1.88537 | 0.73825  | H                           | -2.48008 | -0.74354 | 1.58247  |
| H                           | -2.8151  | 0.95726  | 1.38472  | H                           | 2.23016  | 0.8174   | 1.64818  | H                           | -1.74802 | -1.63661 | -0.88475 | H                           | -2.61096 | -1.72523 | 0.0925   |
| <b>1E</b>                   |          |          |          |                             |          |          |          |                             |          |          |          |                             |          |          |          |
| Symbolic Z-matrix:          |          |          |          |                             |          |          |          |                             |          |          |          |                             |          |          |          |
| Charge = 0 Multiplicity = 1 |          |          |          |                             |          |          |          |                             |          |          |          |                             |          |          |          |
| C                           | -2.57665 | -0.81521 | 0.49427  |                             |          |          |          |                             |          |          |          |                             |          |          |          |
| H                           | -1.96322 | -1.16416 | 1.33724  |                             |          |          |          |                             |          |          |          |                             |          |          |          |
| H                           | -3.54582 | -0.4696  | 0.88148  |                             |          |          |          |                             |          |          |          |                             |          |          |          |
| H                           | -2.75061 | -1.63829 | -0.21344 |                             |          |          |          |                             |          |          |          |                             |          |          |          |
| S                           | -1.8096  | 0.63023  | -0.34102 |                             |          |          |          |                             |          |          |          |                             |          |          |          |
| H                           | -0.65045 | 0.01179  | -0.70293 |                             |          |          |          |                             |          |          |          |                             |          |          |          |
| C                           | 2.10305  | 0.9784   | 0.54851  |                             |          |          |          |                             |          |          |          |                             |          |          |          |
| H                           | 1.10301  | 1.27788  | 0.89247  |                             |          |          |          |                             |          |          |          |                             |          |          |          |
| H                           | 2.81559  | 0.95686  | 1.38464  |                             |          |          |          |                             |          |          |          |                             |          |          |          |
| H                           | 2.45592  | 1.7008   | -0.20126 |                             |          |          |          |                             |          |          |          |                             |          |          |          |
| S                           | 2.04264  | -0.64717 | -0.30883 |                             |          |          |          |                             |          |          |          |                             |          |          |          |
| H                           | 1.64847  | -1.38344 | 0.76272  |                             |          |          |          |                             |          |          |          |                             |          |          |          |

## Trimer

|                                                                                                                 |                                                                                                                                                                                                                                                                                                                                                                                                                                                                                                                        |                                                                                                            |                                                                                                                                                                                                                                                                                                                                                                                                                                                                                                                             |                                                                                                            |                                                                                                                                                                                                                                                                                                                                                                                                                                                                                                                           |                                                                                                            |                                                                                                                                                                                                                                                                                                                                                                                                                                                                                                                          |
|-----------------------------------------------------------------------------------------------------------------|------------------------------------------------------------------------------------------------------------------------------------------------------------------------------------------------------------------------------------------------------------------------------------------------------------------------------------------------------------------------------------------------------------------------------------------------------------------------------------------------------------------------|------------------------------------------------------------------------------------------------------------|-----------------------------------------------------------------------------------------------------------------------------------------------------------------------------------------------------------------------------------------------------------------------------------------------------------------------------------------------------------------------------------------------------------------------------------------------------------------------------------------------------------------------------|------------------------------------------------------------------------------------------------------------|---------------------------------------------------------------------------------------------------------------------------------------------------------------------------------------------------------------------------------------------------------------------------------------------------------------------------------------------------------------------------------------------------------------------------------------------------------------------------------------------------------------------------|------------------------------------------------------------------------------------------------------------|--------------------------------------------------------------------------------------------------------------------------------------------------------------------------------------------------------------------------------------------------------------------------------------------------------------------------------------------------------------------------------------------------------------------------------------------------------------------------------------------------------------------------|
| Symbolic Z-matrix:<br>Charge = 0 Multiplicity = 1                                                               | <b>2A</b>                                                                                                                                                                                                                                                                                                                                                                                                                                                                                                              | Symbolic Z-matrix:<br>Charge = 0 Multiplicity = 1                                                          | <b>2B</b>                                                                                                                                                                                                                                                                                                                                                                                                                                                                                                                   | Symbolic Z-matrix:<br>Charge = 0 Multiplicity = 1                                                          | <b>2C</b>                                                                                                                                                                                                                                                                                                                                                                                                                                                                                                                 | Symbolic Z-matrix:<br>Charge = 0 Multiplicity = 1                                                          | <b>2D</b>                                                                                                                                                                                                                                                                                                                                                                                                                                                                                                                |
| S<br>C<br>H<br>H<br>H<br>H<br>S<br>C<br>H<br>H<br>H<br>S<br>C<br>H<br>H<br>H<br>S<br>C<br>H<br>H<br>H<br>H<br>H | -0.99556 2.20184 -0.66784<br>-0.90035 2.33255 1.15716<br>0.23967 1.67632 -0.84161<br>-1.84999 2.7809 1.49278<br>-0.07092 2.98893 1.46657<br>-0.79177 1.34266 1.63044<br>-1.40788 -1.9623 -0.66834<br>-1.57205 -1.94617 1.15642<br>-1.57049 -0.63011 -0.84199<br>-1.48674 -2.99295 1.49177<br>-2.5554 -1.55549 1.46452<br>-0.76937 -1.35794 1.63113<br>2.40396 -0.23778 -0.66783<br>2.47145 -0.38803 1.15696<br>1.33197 -1.04516 -0.84184<br>3.33465 0.21 1.4927<br>2.62557 -1.43485 1.46508<br>1.56011 0.01217 1.63127 | S<br>C<br>H<br>H<br>H<br>S<br>C<br>H<br>H<br>H<br>S<br>C<br>H<br>H<br>H<br>S<br>C<br>H<br>H<br>H<br>H<br>H | 2.15686 -0.24412 0.81484<br>3.29549 -0.22755 -0.62756<br>3.85275 0.7184 -0.67634<br>4.00463 -1.05285 -0.47193<br>2.7518 -0.39595 -1.56763<br>1.35992 0.78618 0.4058<br>-0.7343 2.17527 -0.66729<br>-1.67891 2.57463 0.85727<br>-1.41354 1.89865 1.68237<br>-1.39973 3.60103 1.13449<br>-2.76131 2.53824 -0.66799<br>-1.18376 0.89495 -0.81056<br>-1.19989 -1.87841 -0.7524<br>-1.99519 -2.44007 0.80599<br>-1.50933 -3.34821 1.18962<br>-1.97863 -1.65131 1.57111<br>-3.03979 -2.67304 0.55516<br>0.02596 -1.60203 -0.21881 | S<br>C<br>H<br>H<br>H<br>S<br>C<br>H<br>H<br>H<br>S<br>C<br>H<br>H<br>H<br>S<br>C<br>H<br>H<br>H<br>H<br>H | 2.15661 -0.23877 0.81419<br>3.29516 -0.21823 -0.62824<br>1.35619 0.78882 0.40511<br>4.00734 -1.04088 -0.47247<br>2.75197 -0.38885 -1.5682<br>3.84891 0.72976 -0.67726<br>-1.19639 -1.88139 -0.75277<br>-1.98343 -2.44924 0.80758<br>0.03044 -1.60139 -0.22335<br>-3.02818 -2.6854 0.56038<br>-1.4928 -3.35647 1.18728<br>-1.9666 -1.66211 1.57436<br>-0.74138 2.17324 -0.66733<br>-1.6837 2.57391 0.85832<br>-1.18931 0.89206 -0.80769<br>-1.40581 3.60135 1.13296<br>-2.7664 2.53521 0.67326<br>-1.41545 1.90002 1.68421 | S<br>C<br>H<br>H<br>H<br>S<br>C<br>H<br>H<br>H<br>S<br>C<br>H<br>H<br>H<br>S<br>C<br>H<br>H<br>H<br>H<br>H | -0.39682 2.48325 -0.53966<br>-0.44059 2.04845 1.2404<br>-1.02636 1.36579 -0.96994<br>0.12576 2.83 1.77327<br>-1.47443 2.03837 1.62328<br>0.04011 1.07407 1.42486<br>-1.61014 -1.48512 -0.76941<br>-2.54409 -1.48019 0.80749<br>-0.37724 -1.49397 -0.21205<br>-3.61334 -1.44953 0.54105<br>-2.34864 -2.39613 1.38804<br>-2.30325 -0.59241 1.41418<br>2.24687 -0.99628 0.69953<br>2.46417 -0.33931 -0.99841<br>2.78251 -2.21643 0.47034<br>1.97771 0.6495 -1.00949<br>3.53171 -0.22626 -1.2462<br>1.9699 -0.98631 -1.74148 |

|                                                                                                  |                                                                                                                                                                                                                                                                                                                                                                                                                                                                                                                            |
|--------------------------------------------------------------------------------------------------|----------------------------------------------------------------------------------------------------------------------------------------------------------------------------------------------------------------------------------------------------------------------------------------------------------------------------------------------------------------------------------------------------------------------------------------------------------------------------------------------------------------------------|
| Symbolic Z-matrix:<br>Charge = 0 Multiplicity = 1                                                | <b>2E</b>                                                                                                                                                                                                                                                                                                                                                                                                                                                                                                                  |
| S<br>C<br>H<br>H<br>H<br>H<br>S<br>C<br>H<br>H<br>H<br>H<br>H<br>S<br>C<br>H<br>H<br>H<br>H<br>H | -1.64106 -1.3988 -0.61091<br>-2.91442 -1.09152 0.67029<br>-0.57594 -1.39849 0.22409<br>-3.88318 -1.04386 0.14646<br>-2.94725 -1.91414 1.40263<br>-2.74314 -0.13374 1.18757<br>0.1696 2.37109 -0.71491<br>-0.60136 2.26871 0.94406<br>-0.47649 1.29884 -1.22732<br>-0.15151 3.06854 1.55526<br>-1.6895 2.43499 0.88804<br>-0.39167 1.29556 1.41746<br>2.14075 -0.82285 0.87207<br>2.3516 -1.45374 -0.83572<br>1.94812 0.46814 0.51538<br>2.44333 -2.54987 -0.76236<br>1.47749 -1.20916 -1.46125<br>3.26615 -1.0486 -1.29765 |
